# Supplementary material for: Sl-IAA3, a tomato Aux/IAA at the crossroads of auxin and ethylene signalling involved in differential growth
Source: PubMed Central journal article supplement — J Exp Bot. 2009 Feb 12;60(4):1349–62. doi: 10.1093/jxb/erp009 (PMC2657550; doi:10.1093/jxb/erp009), 2009-02-12
Supplement: erp009_1.pdf [file erp009_1.pdf]

## **SUPPLEMENTARY MATERIAL**

### **SI-IAA3, a tomato Aux/IAA at the crossroads of auxin and ethylene signalling involved in differential growth**

Salma Chaabouni<sup>1</sup>, Brian Jones<sup>2</sup>, Corinne Delalande<sup>1</sup>, Hua Wang<sup>1</sup>, Zhengguo Li<sup>1</sup>,  
Isabelle Mila<sup>1</sup>, Pierre Frasse<sup>1</sup>, Alain Latché<sup>1</sup>, Jean-Claude Pech<sup>1</sup>, and Mondher  
Bouzayen<sup>1\*</sup>

## Supplementary Tables

Table S1. Percentage identity of the antisense region relative to the other members of tomato *Aux/IAAs* family.

| Target genes  | % of identity |
|---------------|---------------|
| <b>SI-AA3</b> | <b>100</b>    |
| IAA1          | 79            |
| IAA4          | 74            |
| IAA17         | 67            |
| IAA14         | 65            |
| IAA8          | 65            |
| IAA16         | 64            |
| IAA27         | 64            |
| IAA7          | 63            |
| IAA9          | 63            |
| IAA6          | 62            |
| IAA12         | 59            |
| IAA26         | 56            |
| IAA13         | 56            |
| IAA29         | 54            |

Table S2. Auxin- and ethylene-response genes. The accession numbers and primers-sequences of the genes described in this article are listed below.

| Category                    | SGN Number  | Primers sequences                                                                         |
|-----------------------------|-------------|-------------------------------------------------------------------------------------------|
| <b>Auxin-response genes</b> |             |                                                                                           |
| <b><i>Aux/IAAs</i></b>      |             |                                                                                           |
| <b><i>IAA1</i></b>          | SGN-U323670 | <b>F 5'-TGAATCTAAGTCAAGTTCTGATCATGTC-3'</b><br><b>R 5'-ATGATGTTTTTCTGTTAGATCTCACTG-3'</b> |
| <b><i>IAA4</i></b>          | SGN-U316052 | <b>F 5'-AACAAAGAGGGCTTTGCCTGAG-3'</b><br><b>R 5'-GTGTCTTGGCAACAGGTGGA-3'</b>              |
| <b><i>IAA6</i></b>          | SGN-U320280 | <b>F 5'-CCAAAAGAGGGAATGGAGGTT-3'</b><br><b>R 5'-TGTTCTCCCTTCATCATCATTTTTTC-3'</b>         |
| <b><i>IAA7</i></b>          | SGN-U318191 | <b>F5'-ACTCAACCTCCATCATAATGATAATATTCC-3'</b><br><b>R 5'-ACCCACCACTTGAGCCTTA-3'</b>        |
| <b><i>IAA8</i></b>          | SGN-U317606 | <b>F 5'-CCTAACAATCTGTAATTCTCAAAGTGAAA-3'</b><br><b>R 5'-GCATCCAGTCTCCATCTTTATCTTC-3'</b>  |
| <b><i>IAA9</i></b>          | SGN-U313802 | <b>F 5'-CCCCTTGCACCCTTCCA-3'</b><br><b>R 5'-AGCGTCTGAAAATCCTCGTTTG-3'</b>                 |

|                                |             |                                                                                |
|--------------------------------|-------------|--------------------------------------------------------------------------------|
| <b>IAA12</b>                   | SGN-U322787 | F 5'-CCACGCGATCTTCAGCATAA-3'<br>R 5'-TCTGTTTCAGGGAGCGGC-3'                     |
| <b>IAA13</b>                   | SGN-U322644 | F 5'-AGTCTTTTAAGCTCTTGGATGGATCA-3'<br>R 5'-AAACATCCCGAATGGAACATCT-3'           |
| <b>IAA14</b>                   | SGN-U318434 | F 5'-GTTTACGCATAATGAAAGGATCAGAAG-3'<br>R 5'-TTATCTATGGAGCTTGCACACCA-3'         |
| <b>IAA16</b>                   | SGN-U332300 | F 5'-GCGTGTTGGGTGCGGA-3'<br>R 5'-CGATTCCAGTTCATTCCCATTAG-3'                    |
| <b>IAA17</b>                   | SGN-U323974 | F 5'-CAAGAATTATTTGATGCCTTAACCAA-3'<br>R 5'-ACTATTCAAAGGTCCATCAGTTTCC-3'        |
| <b>IAA26</b>                   | SGN-U320412 | F 5'-AAAGGCTGCGTGTGTTGAAA-3'<br>R 5'-CAAGATCTGTTGGCTCTACATCTTGT-3'             |
| <b>IAA27</b>                   | SGN-U322175 | F 5'-ATTCTGCTACTTTGATAATCTTGCACA-3'<br>R 5'-TGTCCATTGATGAAACACAGCTCT-3'        |
| <b>IAA29</b>                   | SGN-U320261 | F 5'-GGTTTTGATGATAGCTTCTCCGATA-3'<br>R 5'-ACGTCTTACGTTCAACTACTCCTTCA-3'        |
| <b>ARFs</b>                    |             |                                                                                |
| <b>ARF1</b>                    | SGN-U317693 | F 5'-TCTCCTTCATCATTCTCATACTG-3'<br>R 5'-GAACCATTCTCACCATAACC-3'                |
| <b>ARF2</b>                    | SGN-U314233 | F 5'-GCAAGGTCAAGAGTTATCGA-3'<br>R 5'-CATTGGTTTCTCAGACAAGTC-3'                  |
| <b>ARF3</b>                    | SGN-U320946 | F 5'-AATTGCAGTATCAGACTTTGG-3'<br>R 5'-TCTAGATATCCCAGAACTAGGA-3'                |
| <b>ARF4</b>                    | SGN-U319581 | F 5'-CATTATTGTTGGTGACTTTGTG-3'<br>R 5'-GACCTTTGGAACCTATTGG-3'                  |
| <b>ARF5</b>                    | SGN-U324457 | F 5'-CCTTCAGAGTTTGTCACTTCCT-3'<br>R 5'-AACATCATTCCAAATCTCATACC-3'              |
| <b>ARF6</b>                    | SGN-U319318 | F 5'-CCAACATATCCCTAGTACTTCAG-3'<br>R 5'-GTGCCTGAGATATTAGTTGGT-3'               |
| <b>ARF7</b>                    | SGN-U327712 | F 5'-TCAACTCCTCAAACATACCT-3'<br>R 5'-TGAACTATCCAAATAATCCATCTG-3'               |
| <b>ARF8</b>                    | SGN-U327976 | F 5'-TGACATCGAATGGAAATTCAG-3'<br>R 5'-GTCTCTTAGCACTAACAAACAC-3'                |
| <b>ARF11</b>                   | SGN-U327759 | F 5'-TCATTGTTGGATGTTTCAAAGG-3'<br>R 5'-GAAGTCTTGGAAAGTAGTATACTC-3'             |
| <b>ARF18</b>                   | SGN-U321591 | F 5'-AATCTACACTCGGCATTGTC-3'<br>R 5'-AAGCTTCTATCTTATCATTGGA-3'                 |
| <b>SAUR</b>                    | SGN-U318031 | F 5'-TCCAATGGGCGGTGTCA-3'<br>R 5'-GCCTCAGATCCTATTCAAGCGA-3'                    |
| <b>GH3</b>                     | SGN-U319351 | F 5'-CATCACAACATACGCCGTTTATA-3'<br>R 5'-GCTGAGTTGTGAAACCCGGT-3'                |
| <b>Ethylene-response genes</b> |             |                                                                                |
| <b>ERFs</b>                    |             |                                                                                |
| <b>Pti6</b>                    | SGN-U314347 | F 5'-CGGTGGAGATAAAAGCGAAAAC-3'<br>R 5'-CCACTTCGCAGAACCCTAGATT-3'               |
| <b>JERF1</b>                   | SGN-U313488 | F 5'-ACTTCGTGAGGAAACCCTGAAC-3'<br>R 5'-GTTACTAATATAAGTCATGTTGGGCTGAA-3'        |
| <b>JERF2</b>                   | SGN-U320682 | F 5'-TTCTTCGTGTCGAAAATACTAAGTTCAGT-3'<br>R 5'-ACTCTAAATTCTTCAAGAAATCCAGAACA-3' |

---

|                       |             |                                                                             |
|-----------------------|-------------|-----------------------------------------------------------------------------|
|                       | SGN-U329134 | F 5'-GAAGAAAGCGATCGATTTGAAGA-3'<br>R 5'-TTTTCCCATGGCCTCTGT-3'               |
|                       | SGN-U319706 | F 5'-ATCATTACCATGGAATGATCAACATT-3'<br>R 5'-CCGTCTATAACTTTCTTTTCGAGGTTAA-3'  |
| <b>Le ERF2</b>        | SGN-U315233 | F 5'-GTTCTCTCAACCCCAAACG-3'<br>R 5'-TTCATCTGCTCACCCACCTGTAGA-3'             |
|                       | SGN-U315595 | F 5'-GAATGATGACGGAATTGTAATGAAGA-3'<br>R 5'-TTCCACAATCCCAAATTGAAGA-3'        |
|                       | SGN-U317007 | F 5'-GAGCTAATGGCTGATTTTTGTATATAAGTT-3'<br>R 5'-AAATGGTAGAAACAGCACGAGAAAG-3' |
| <b>Le ERF4</b>        | SGN-U321808 | F 5'-CGGAGATAAGAGATCCAAGTCGAA-3'<br>R 5'-CTTAAACGCTGCACAATCATAAGC-3'        |
| <b>Le ERF3</b>        | SGN-U315194 | F 5'-TGGAGCGAAAGCGAAAATAA-3'<br>R 5'-GTCTGACTCGGACTCCGATTG-3'               |
|                       | SGN-U327266 | F 5'-CACCGTAGTAAGGTGACCCGGATGAAG-3'<br>R 5'-CACCGATCATCCACCACAGA-3'         |
| <b>Pti4</b>           | SGN-U317071 | F 5'-GCGAAATGGATCAACAGTTACCA-3'<br>R 5'-ATTAGACGACTGAAGCTTGAATTCC-3'        |
| <b>SI-HLS</b>         |             | F 5'-CCTATACCGCCGCCGATACT-3'<br>R 5'-ACC GAGATTGAGAGGGTTGTTG-3'             |
| <b>E8</b>             | SGN-U314505 | F 5'-CTACTACCCACCATGTCCTCAGC-3'<br>R 5'-AAGGATCGTTACAAAACCAATATCG-3'        |
| <b>Reference gene</b> |             |                                                                             |
| <b>Actin</b>          | Q96483      | F 5'-TGTCCCTATTTACGAGGGTTATGC-3'<br>R 5'-AGTTAAATCACGACCAGCAAGAT-3'         |

---

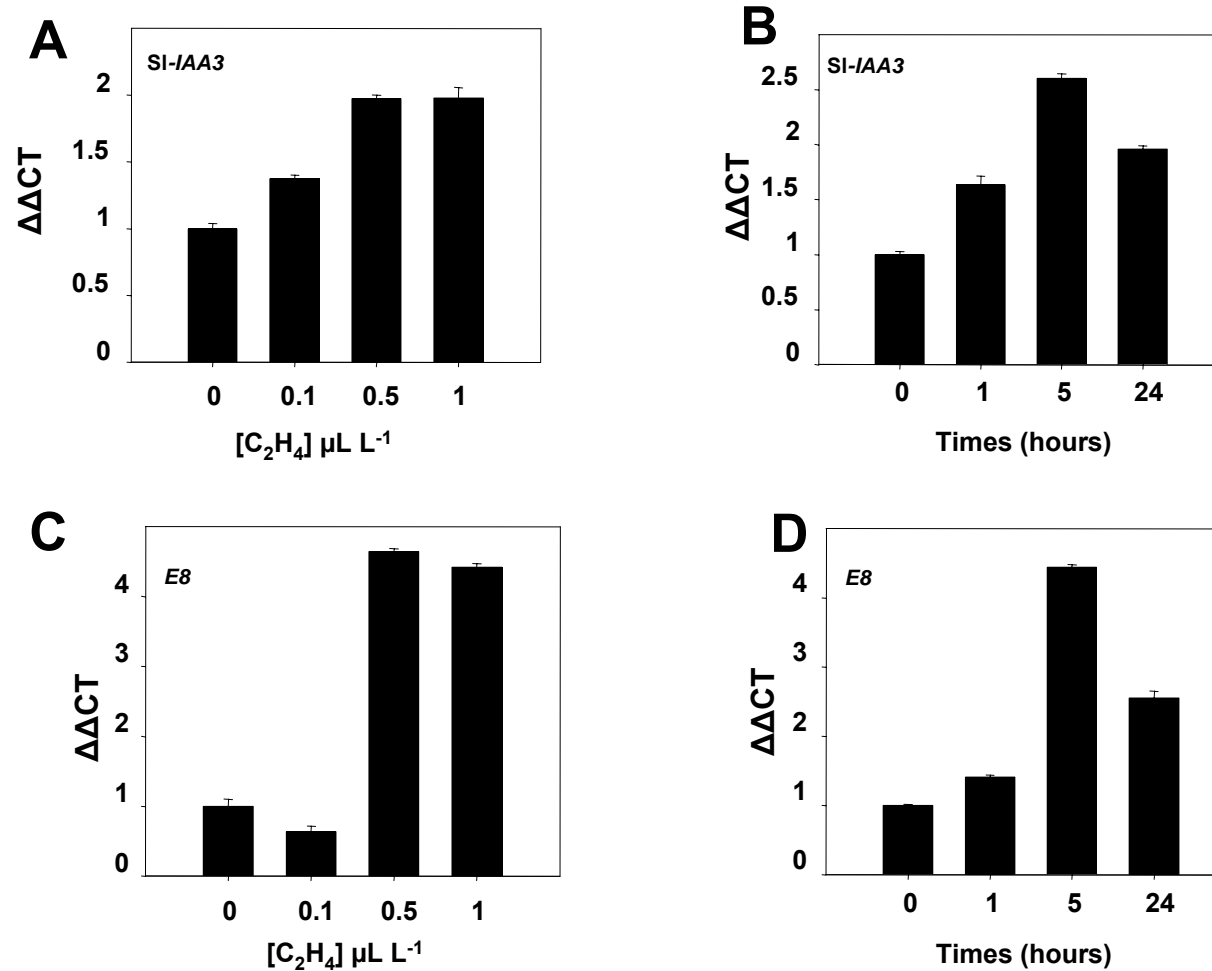

**Fig. S1.** Ethylene regulation of SI-IAA3. Ethylene dose response (**A**) and time course (**B**) of SI-IAA3 induction in 5-day-old dark-grown WT seedlings. Expression of the ethylene-responsive gene *E8* was used as control for hormone treatment (**C,D**).  $\Delta\Delta\text{CT}$  on the y axis refers to the fold difference in SI-IAA3 expression relative to untreated seedlings. The data are mean values of 3 replicates  $\pm$ SE.

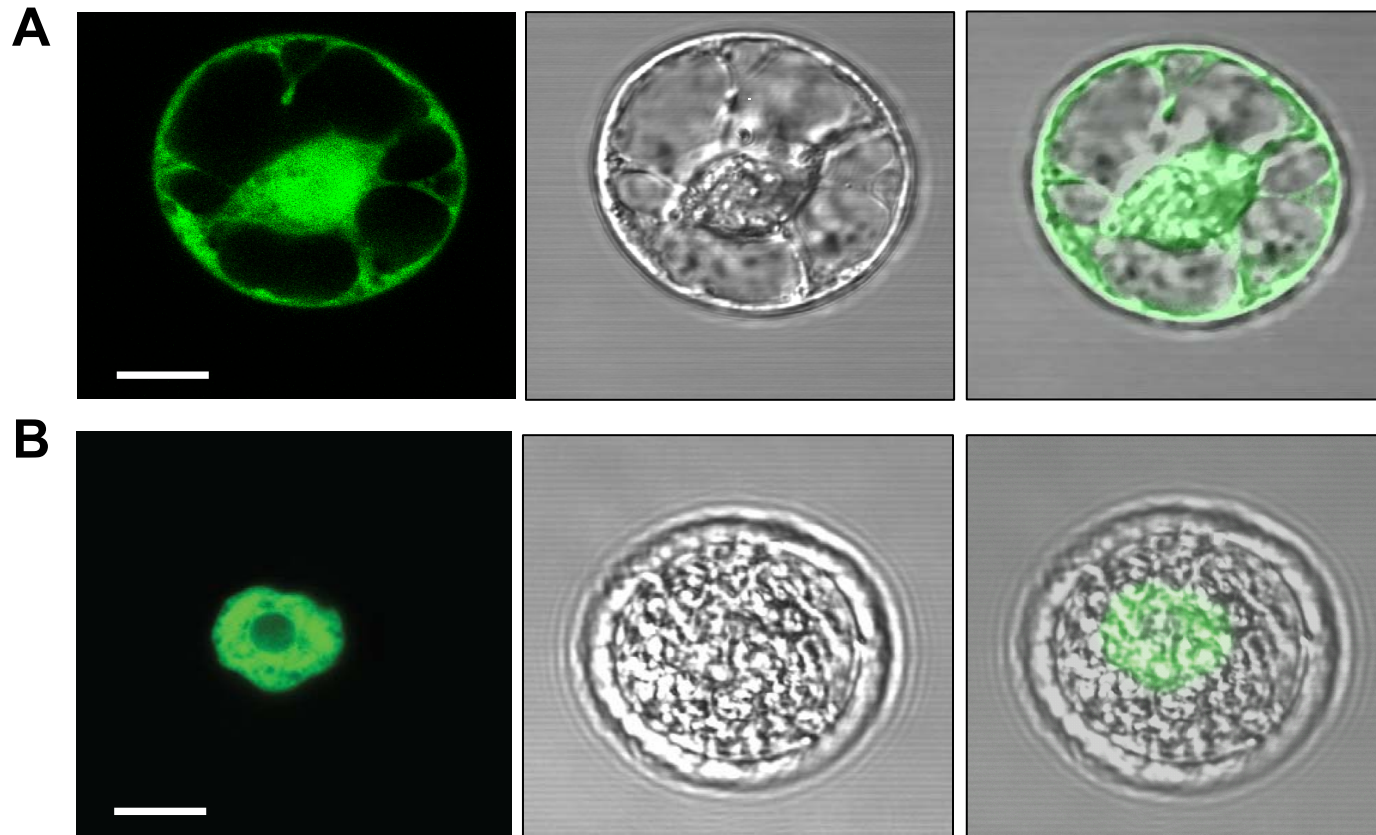

**Fig. S2.** Subcellular localization of SI-IAA3 protein. SI-IAA3::GFP fusion protein was transiently expressed in BY-2 tobacco protoplasts and sub-cellular localization was analyzed by confocal laser scanning microscopy. The merged pictures of the green fluorescence channel (left panels) and the corresponding bright field (middle panels) are shown (right panels). **A.** Control cells expressing GFP alone. **B.** Cells expressing the SI-IAA3::GFP fusion protein. The scale bar indicates 10  $\mu\text{m}$ .

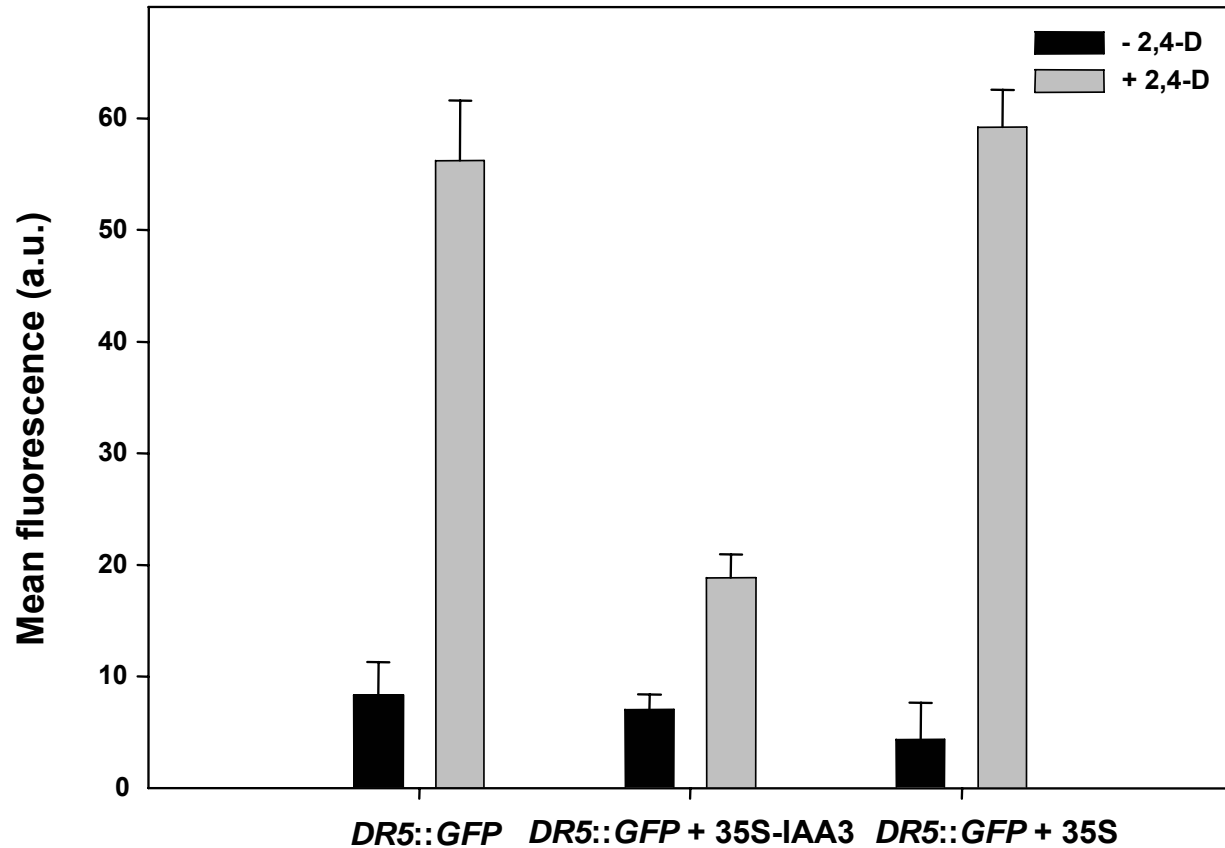

**Fig. S3.** SI-IAA3 protein represses *in vivo* the activity of *DR5*. Tobacco protoplasts were transformed either with the reporter construct (*DR5::GFP*) alone or with both the reporter and effector constructs (35S-IAA3) and incubated in the presence or absence of 50  $\mu$ M 2,4-D. GFP fluorescence was measured 16 h after transfection. A mock effector construct lacking SI-IAA3 was used as a control for the co-transfection experiments. Transformations were performed in triplicate. Mean fluorescence is indicated in arbitrary unit (a.u.)  $\pm$ SE.
